# Supplementary material for: Complement and Non-Complement Binding Anti-HLA Antibodies Are Differentially Detected with Different Antigen Bead Assays in Renal Transplant Recipients
Source: MDPI journal article supplement (doi:10.3390/jcm12247733), 2023-12-17
Supplement: s1 [file s1]

## Supplementary Materials

### **Complement and Non-complement - Binding anti-HLA Antibodies are Differentially Detected with Different Antigen Bead Assays**

#### **Contents**

#### **Section S1: Supplemental Tables and Figures**

**Table S1:** Common beads between Immucor (IC) and One-Lambda (OL) assays that were included in the statistical analysis

**Table S2:** Linear correlation between positive specificities detected by Immucor (IC) and One-Lambda (OL) assays

**Figure S1.** Comparison of MFI values between complement-binding and non-complement binding specificities, according to the cause of sensitization. **A.** MFI value of non-complement binding (C3d-) and complement binding (C3d+) class I positive specificities by Immucor (IC) in non-transplanted (KTx-) and transplanted (KTx+) patients, **B.** MFI value of C1q- and C1q+ class I positive specificities by One-Lambda (OL) in non-transplanted (KTx-) and transplanted (KTx+) patients, **C.** MFI value of C3d- and C3d+ class II positive specificities by IC in non-transplanted (KTx-) and transplanted (KTx+) patients, **D.** MFI value of C1q- and C1q+ class II positive specificities by OL in non-transplanted (KTx-) and transplanted (KTx+) patients.

## Section S1: Supplemental Tables and Figures

**Table S1:** Common beads between Immucor (IC) and One-Lambda (OL) assays that were included in the statistical analysis

| HLA class I |         |         | HLA class II |            |            |
|-------------|---------|---------|--------------|------------|------------|
| A*01:01     | B*07:02 | C*01:02 | DPA1*01:03   | DQA1*01:01 | DRB1*01:01 |
| A*02:01     | B*08:01 | C*02:02 | DPA1*02:01   | DQA1*01:02 | DRB1*01:02 |
| A*02:03     | B*13:02 | C*03:03 | DPA1*02:02   | DQA1*01:03 | DRB1*01:03 |
| A*03:01     | B*14:01 | C*03:04 | DPA1*03:01   | DQA1*02:01 | DRB1*03:01 |
| A*11:01     | B*14:02 | C*04:01 | DPA1*04:01   | DQA1*03:01 | DRB1*03:02 |
| A*11:02     | B*15:01 | C*05:01 | DPB1*01:01   | DQA1*03:02 | DRB1*04:01 |
| A*23:01     | B*15:02 | C*06:02 | DPB1*02:01   | DQA1*04:01 | DRB1*04:02 |
| A*24:02     | B*15:03 | C*07:02 | DPB1*03:01   | DQA1*05:01 | DRB1*04:03 |
| A*24:03     | B*15:12 | C*08:01 | DPB1*04:01   | DQA1*06:01 | DRB1*04:04 |
| A*25:01     | B*15:13 | C*14:02 | DPB1*04:02   | DQB1*02:01 | DRB1*04:05 |
| A*26:01     | B*15:16 | C*15:02 | DPB1*05:01   | DQB1*02:02 | DRB1*07:01 |
| A*29:01     | B*18:01 | C*16:01 | DPB1*06:01   | DQB1*03:01 | DRB1*08:01 |
| A*29:02     | B*27:05 | C*17:01 | DPB1*09:01   | DQB1*03:02 | DRB1*09:01 |
| A*30:01     | B*27:08 |         | DPB1*11:01   | DQB1*03:03 | DRB1*10:01 |
| A*31:01     | B*35:01 |         | DPB1*13:01   | DQB1*04:01 | DRB1*11:01 |
| A*32:01     | B*37:01 |         | DPB1*14:01   | DQB1*04:02 | DRB1*11:04 |
| A*33:01     | B*38:01 |         | DPB1*15:01   | DQB1*05:01 | DRB1*12:01 |
| A*33:03     | B*39:01 |         | DPB1*17:01   | DQB1*05:02 | DRB1*12:02 |
| A*34:02     | B*40:01 |         | DPB1*18:01   | DQB1*06:01 | DRB1*13:01 |
| A*36:01     | B*40:02 |         | DPB1*19:01   | DQB1*06:02 | DRB1*13:03 |
| A*43:01     | B*41:01 |         | DPB1*28:01   | DQB1*06:03 | DRB1*14:01 |
| A*66:01     | B*42:01 |         |              | DQB1*06:04 | DRB1*15:01 |
| A*66:02     | B*44:02 |         |              |            | DRB1*15:02 |
| A*68:01     | B*44:03 |         |              |            | DRB1*15:03 |
| A*68:02     | B*45:01 |         |              |            | DRB1*16:01 |
| A*69:01     | B*46:01 |         |              |            | DRB1*16:02 |
| A*74:01     | B*47:01 |         |              |            | DRB3*01:01 |
| A*80:01     | B*48:01 |         |              |            | DRB3*02:02 |
|             | B*49:01 |         |              |            | DRB3*03:01 |
|             | B*50:01 |         |              |            | DRB4*01:01 |
|             | B*51:01 |         |              |            | DRB5*01:01 |
|             | B*52:01 |         |              |            | DRB5*02:02 |
|             | B*53:01 |         |              |            |            |
|             | B*54:01 |         |              |            |            |
|             | B*55:01 |         |              |            |            |
|             | B*56:01 |         |              |            |            |
|             | B*57:01 |         |              |            |            |
|             | B*58:01 |         |              |            |            |
|             | B*59:01 |         |              |            |            |

|         |
|---------|
| B*67:01 |
| B*73:01 |
| B*78:01 |
| B*81:01 |

Abbreviations list: HLA: human leukocyte antigen.

**Table S2:** Linear correlation between positive specificities detected by Immucor (IC) and One-Lambda (OL) assays

| Bead    | N  | Spearman Correlation |        | Bead       | N  | Spearman Correlation |        |
|---------|----|----------------------|--------|------------|----|----------------------|--------|
|         |    | R                    | P      |            |    | R                    | P      |
| A*01:01 | 24 | 0.48                 | 0.017  | DRB1*01:01 | 8  | 0.31                 | 0.456  |
| A*02:01 | 24 | 0.36                 | 0.079  | DRB1*01:02 | 8  | 0.33                 | 0.420  |
| A*02:03 | 24 | 0.29                 | 0.161  | DRB1*01:03 | 10 | 0.57                 | 0.082  |
| A*03:01 | 16 | 0.58                 | 0.018  | DRB1*03:01 | 18 | 0.87                 | <0.001 |
| A*11:01 | 26 | 0.59                 | 0.002  | DRB1*03:02 | 19 | 0.81                 | <0.001 |
| A*11:02 | 24 | 0.62                 | 0.001  | DRB1*04:01 | 14 | 0.70                 | 0.005  |
| A*23:01 | 26 | 0.41                 | 0.039  | DRB1*04:02 | 14 | 0.58                 | 0.029  |
| A*24:02 | 29 | 0.61                 | <0.001 | DRB1*04:03 | 13 | 0.88                 | <0.001 |
| A*24:03 | 29 | 0.75                 | <0.001 | DRB1*04:04 | 8  | 0.85                 | 0.007  |
| A*25:01 | 25 | 0.53                 | 0.006  | DRB1*04:05 | 13 | 0.62                 | 0.022  |
| A*26:01 | 20 | 0.49                 | 0.026  | DRB1*07:01 | 21 | 0.79                 | <0.001 |
| A*29:01 | 6  | 0.14                 | 0.787  | DRB1*08:01 | 13 | 0.55                 | 0.049  |
| A*29:02 | 16 | 0.16                 | 0.546  | DRB1*09:01 | 20 | 0.52                 | 0.017  |
| A*30:01 | 15 | 0.66                 | 0.007  | DRB1*10:01 | 10 | 0.41                 | 0.229  |
| A*31:01 | 12 | 0.49                 | 0.102  | DRB1*11:01 | 8  | 0.71                 | 0.047  |
| A*32:01 | 15 | 0.55                 | 0.031  | DRB1*11:04 | 10 | 0.78                 | 0.008  |
| A*33:01 | 14 | 0.56                 | 0.036  | DRB1*12:01 | 15 | 0.43                 | 0.106  |
| A*33:03 | 15 | 0.67                 | 0.006  | DRB1*12:02 | 8  | 0.92                 | 0.001  |
| A*34:02 | 18 | 0.60                 | 0.008  | DRB1*13:01 | 15 | 0.90                 | <0.001 |
| A*36:01 | 24 | 0.82                 | <0.001 | DRB1*13:03 | 13 | 0.87                 | <0.001 |
| A*43:01 | 19 | 0.72                 | <0.001 | DRB1*14:01 | 17 | 0.85                 | <0.001 |
| A*66:01 | 21 | 0.58                 | 0.005  | DRB1*15:01 | 6  | 0.60                 | 0.208  |
| A*66:02 | 19 | 0.39                 | 0.097  | DRB1*15:02 | 5  | -                    | -      |
| A*68:01 | 26 | -0.08                | 0.668  | DRB1*15:03 | 5  | -                    | -      |
| A*68:02 | 26 | 0.27                 | 0.170  | DRB1*16:01 | 5  | -                    | -      |
| A*69:01 | 24 | 0.24                 | 0.252  | DRB1*16:02 | 6  | 0.37                 | 0.468  |
| A*74:01 | 11 | 0.44                 | 0.174  | DRB3*01:01 | 18 | 0.68                 | 0.002  |
| A*80:01 | 23 | 0.79                 | <0.001 | DRB3*02:02 | 9  | 0.2                  | 0.606  |
| B*07:02 | 16 | 0.72                 | 0.002  | DRB3*03:01 | 15 | 0.60                 | 0.018  |
| B*08:01 | 20 | 0.55                 | 0.012  | DRB4*01:01 | 8  | 0.81                 | 0.015  |
| B*13:02 | 23 | 0.52                 | 0.011  | DRB5*01:01 | 12 | 0.21                 | 0.499  |
| B*14:01 | 12 | 0.82                 | 0.001  | DRB5*02:02 | 8  | 0.66                 | 0.071  |
| B*14:02 | 13 | 0.83                 | <0.001 | DQA1*01:01 | 11 | 0.04                 | 0.894  |
| B*15:01 | 15 | 0.68                 | 0.005  | DQA1*01:02 | 7  | 0.25                 | 0.589  |
| B*15:02 | 18 | 0.69                 | 0.001  | DQA1*01:03 | 8  | -0.12                | 0.778  |
| B*15:03 | 15 | 0.69                 | 0.004  | DQA1*02:01 | 10 | -0.38                | 0.276  |
| B*15:12 | 26 | 0.53                 | 0.005  | DQA1*03:01 | 15 | 0.41                 | 0.126  |
| B*15:13 | 20 | 0.78                 | <0.001 | DQA1*03:02 | 17 | 0.27                 | 0.277  |
| B*15:16 | 19 | 0.54                 | 0.018  | DQA1*04:01 | 20 | 0.18                 | 0.442  |
| B*18:01 | 14 | 0.88                 | <0.001 | DQA1*05:01 | 22 | 0.08                 | 0.693  |
| B*27:05 | 29 | 0.68                 | <0.001 | DQA1*06:01 | 9  | 0.18                 | 0.637  |

|         |    |       |        |            |    |       |        |
|---------|----|-------|--------|------------|----|-------|--------|
| B*27:08 | 18 | 0.80  | <0.001 | DQB1*02:01 | 20 | 0.16  | 0.486  |
| B*35:01 | 15 | 0.58  | 0.022  | DQB1*02:02 | 19 | 0.42  | 0.069  |
| B*37:01 | 17 | 0.67  | 0.003  | DQB1*03:01 | 18 | 0.19  | 0.448  |
| B*38:01 | 17 | 0.61  | 0.009  | DQB1*03:02 | 24 | 0.53  | 0.008  |
| B*39:01 | 6  | 0.54  | 0.266  | DQB1*03:03 | 24 | 0.33  | 0.106  |
| B*40:01 | 20 | 0.73  | <0.001 | DQB1*04:01 | 22 | 0.75  | <0.001 |
| B*40:02 | 22 | 0.67  | 0.001  | DQB1*04:02 | 19 | 0.27  | 0.250  |
| B*41:01 | 15 | 0.76  | 0.001  | DQB1*05:01 | 13 | 0.20  | 0.494  |
| B*42:01 | 13 | 0.31  | 0.297  | DQB1*05:02 | 5  | 0.1   | 0.873  |
| B*44:02 | 17 | 0.84  | <0.001 | DQB1*06:01 | 9  | 0.13  | 0.732  |
| B*44:03 | 20 | 0.72  | <0.001 | DQB1*06:02 | 12 | 0.09  | 0.779  |
| B*45:01 | 20 | 0.73  | <0.001 | DQB1*06:03 | 9  | -0.16 | 0.668  |
| B*47:01 | 18 | 0.75  | <0.001 | DQB1*06:04 | 10 | -0.13 | 0.701  |
| B*48:01 | 8  | -0.21 | 0.610  | DPA1*01:03 | 3  | -     | -      |
| B*49:01 | 22 | 0.57  | 0.006  | DPA1*02:01 | 1  | -     | -      |
| B*50:01 | 18 | 0.59  | 0.01   | DPA1*02:02 | 3  | -     | -      |
| B*51:01 | 21 | 0.69  | 0.001  | DPA1*03:01 | 3  | -     | -      |
| B*52:01 | 18 | 0.67  | 0.002  | DPA1*04:01 | 2  | -     | -      |
| B*53:01 | 21 | 0.65  | 0.001  | DPB1*01:01 | 7  | 0.85  | 0.014  |
| B*54:01 | 15 | 0.84  | <0.001 | DPB1*02:01 | 4  | -     | -      |
| B*55:01 | 14 | 0.67  | 0.001  | DPB1*03:01 | 9  | 0.73  | 0.025  |
| B*56:01 | 16 | 0.68  | 0.004  | DPB1*04:01 | 2  | -     | -      |
| B*57:01 | 29 | 0.44  | 0.017  | DPB1*04:02 | 4  | -     | -      |
| B*58:01 | 28 | 0.74  | <0.001 | DPB1*05:01 | 9  | 0.65  | 0.058  |
| B*59:01 | 18 | 0.65  | 0.004  | DPB1*06:01 | 4  | -     | -      |
| B*67:01 | 16 | 0.22  | 0.42   | DPB1*09:01 | 4  | -     | -      |
| B*73:01 | 8  | 0.71  | 0.047  | DPB1*11:01 | 3  | -     | -      |
| B*78:01 | 17 | 0.74  | 0.001  | DPB1*13:01 | 7  | 0.75  | 0.52   |
| B*81:01 | 14 | 0.72  | 0.004  | DPB1*14:01 | 10 | 0.74  | 0.013  |
| C*02:02 | 7  | 0.84  | 0.016  | DPB1*15:01 | 3  | -     | -      |
| C*03:03 | 9  | 0.76  | 0.017  | DPB1*17:01 | 10 | 0.55  | 0.098  |
| C*03:04 | 7  | 0.75  | 0.049  | DPB1*18:01 | 6  | 0.25  | 0.623  |
| C*04:01 | 5  | 0.66  | 0.219  | DPB1*19:01 | 8  | 0.69  | 0.058  |
| C*05:01 | 7  | 0.56  | 0.146  | DPB1*28:01 | 4  | -     | -      |
| C*06:02 | 8  | 0.88  | 0.001  |            |    |       |        |
| C*08:01 | 4  | 0.63  | 0.368  |            |    |       |        |
| C*15:02 | 7  | 0.32  | 0.478  |            |    |       |        |
| C*17:01 | 4  | 0.80  | 0.200  |            |    |       |        |

Abbreviations list: HLA: human leukocyte antigen.

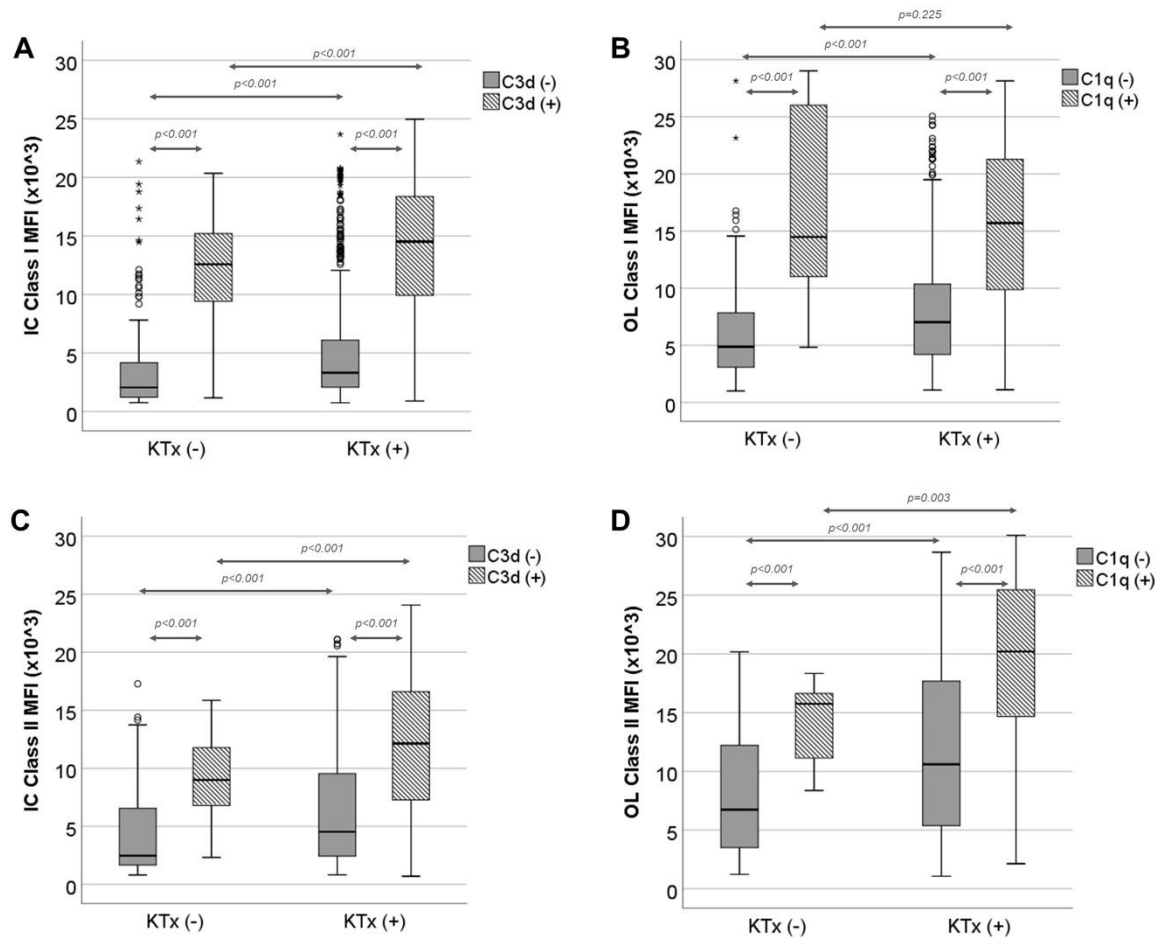

**Figure S1.** Comparison of MFI values between complement binding and non-complement binding specificities, according to the cause of sensitization. **A.** MFI value of non-complement binding (C3d-) and complement binding (C3d+) class I positive specificities by Immucor (IC) in non-transplanted (KTx-) and transplanted (KTx+) patients, **B.** MFI value of C1q- and C1q+ class I positive specificities by One-Lambda (OL) in non-transplanted (KTx-) and transplanted (KTx+) patients, **C.** MFI value of C3d- and C3d+ class II positive specificities by IC in non-transplanted (KTx-) and transplanted (KTx+) patients, **D.** MFI value of C1q- and C1q+ class II positive specificities by OL in non-transplanted (KTx-) and transplanted (KTx+) patients.
